# Supplementary material
Source: Springer Nature journal article supplement (https://www.springermedizin.de/resource/supplementary/12937_2012_615_MOESM2_ESM.pdf/25653782)

Incremental plasma glucose, mmol/L

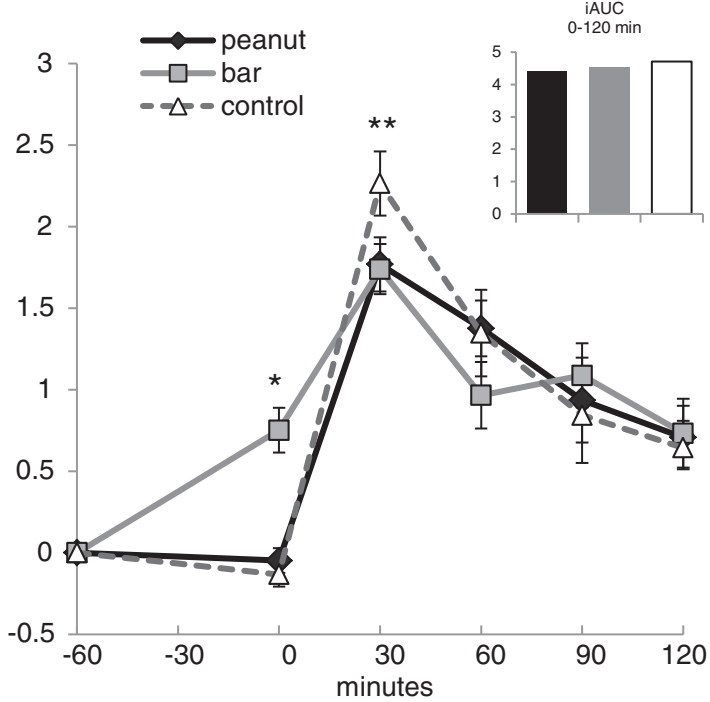

Supplement: MOESM2 [file 25653782]
